# Supplementary material
Source: PubMed Central journal article supplement (PMC5686340)
Supplement: cdd2017114x1.pdf [file cdd2017114x1.pdf]

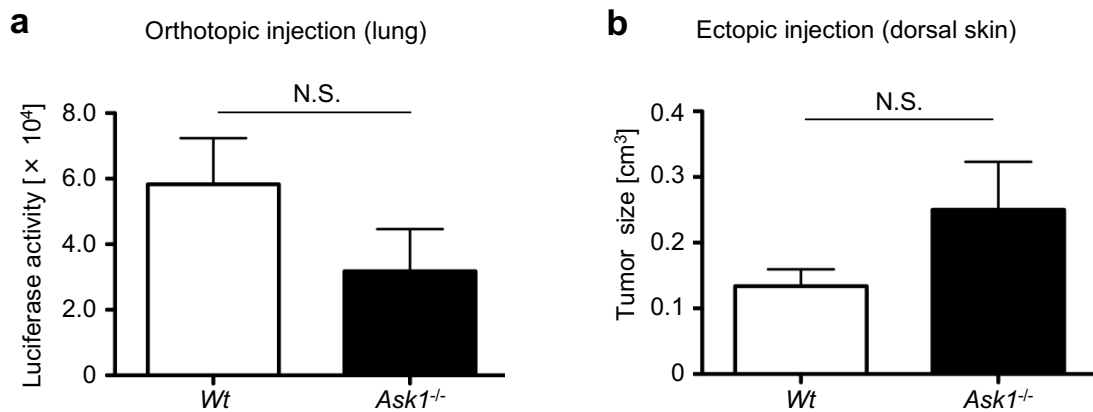

**Supplementary Figure 1** Characterization of ASK1 in mice in the context of tumor

lung metastasis. **(a)** Luciferase activity of the lung lysates at 7 days after orthotopic

injection of 3LL-Luc2 cells (*Wt* mice:  $n = 25$ , *Ask1<sup>-/-</sup>* mice:  $n = 25$ ). **(b)** Tumor volume

at 28 days after subcutaneous injection of 3LL-Luc2 cells (*Wt* mice:  $n = 9$ , *Ask1<sup>-/-</sup>* mice:

$n = 11$ ). The data are shown as the mean  $\pm$  s.e.m. N.S., non-significant. Unpaired

Student's *t*-tests **(a and b)**.

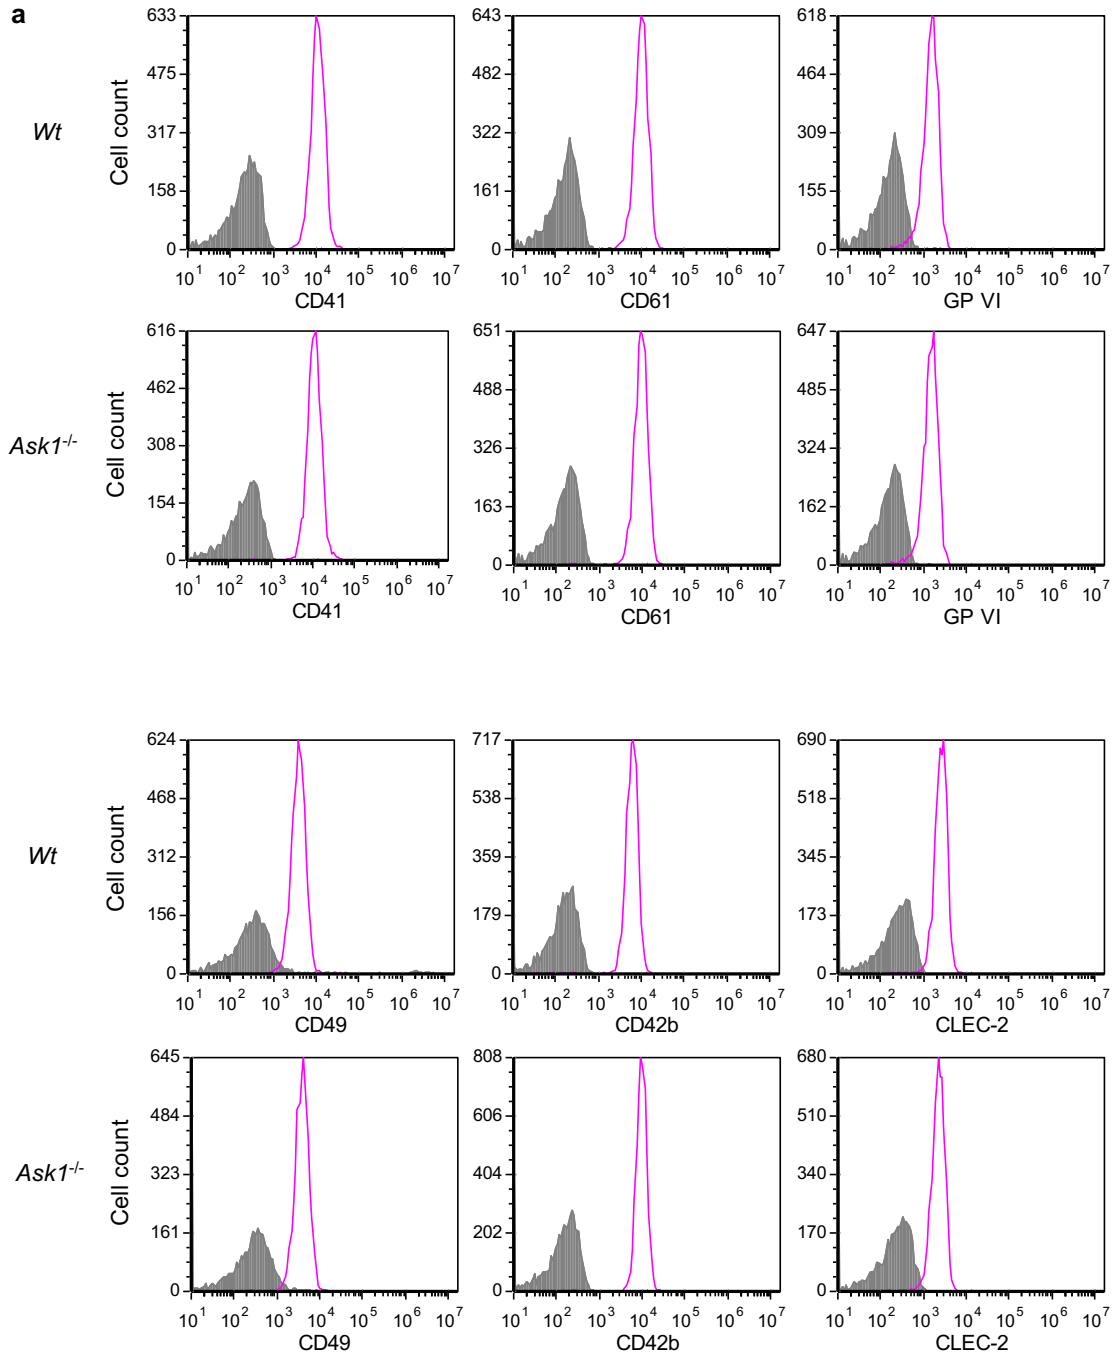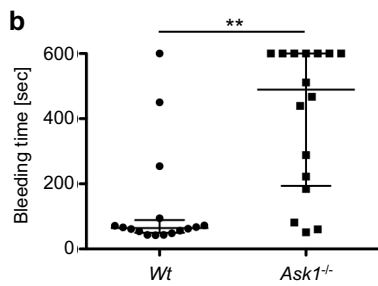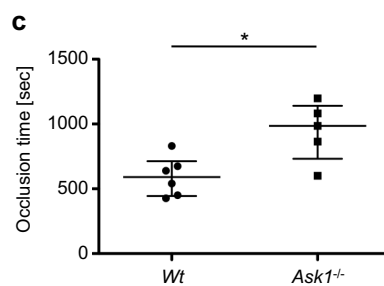

**Supplementary Figure 2** *Ask1*<sup>-/-</sup> mice is normal in surface expression of platelet receptors on platelets but exhibits unstable hemostasis. **(a)** The surface expression of platelet receptors was determined by flow cytometry (n = 3). The isotype controls are noted in gray. **(b)** Bleeding time in the tail bleeding assay (*Wt* mice: n = 16, *Ask1*<sup>-/-</sup> mice: n = 16). **(c)** Occlusion time in the femoral artery in the FeCl<sub>3</sub>-induced thrombosis assay (*Wt* mice: n = 6, *Ask1*<sup>-/-</sup> mice: n = 5). The data are presented with the median and interquartile range. \*\*p < 0.01; \*p < 0.05. Mann-Whitney *U*-test (**b** and **c**).

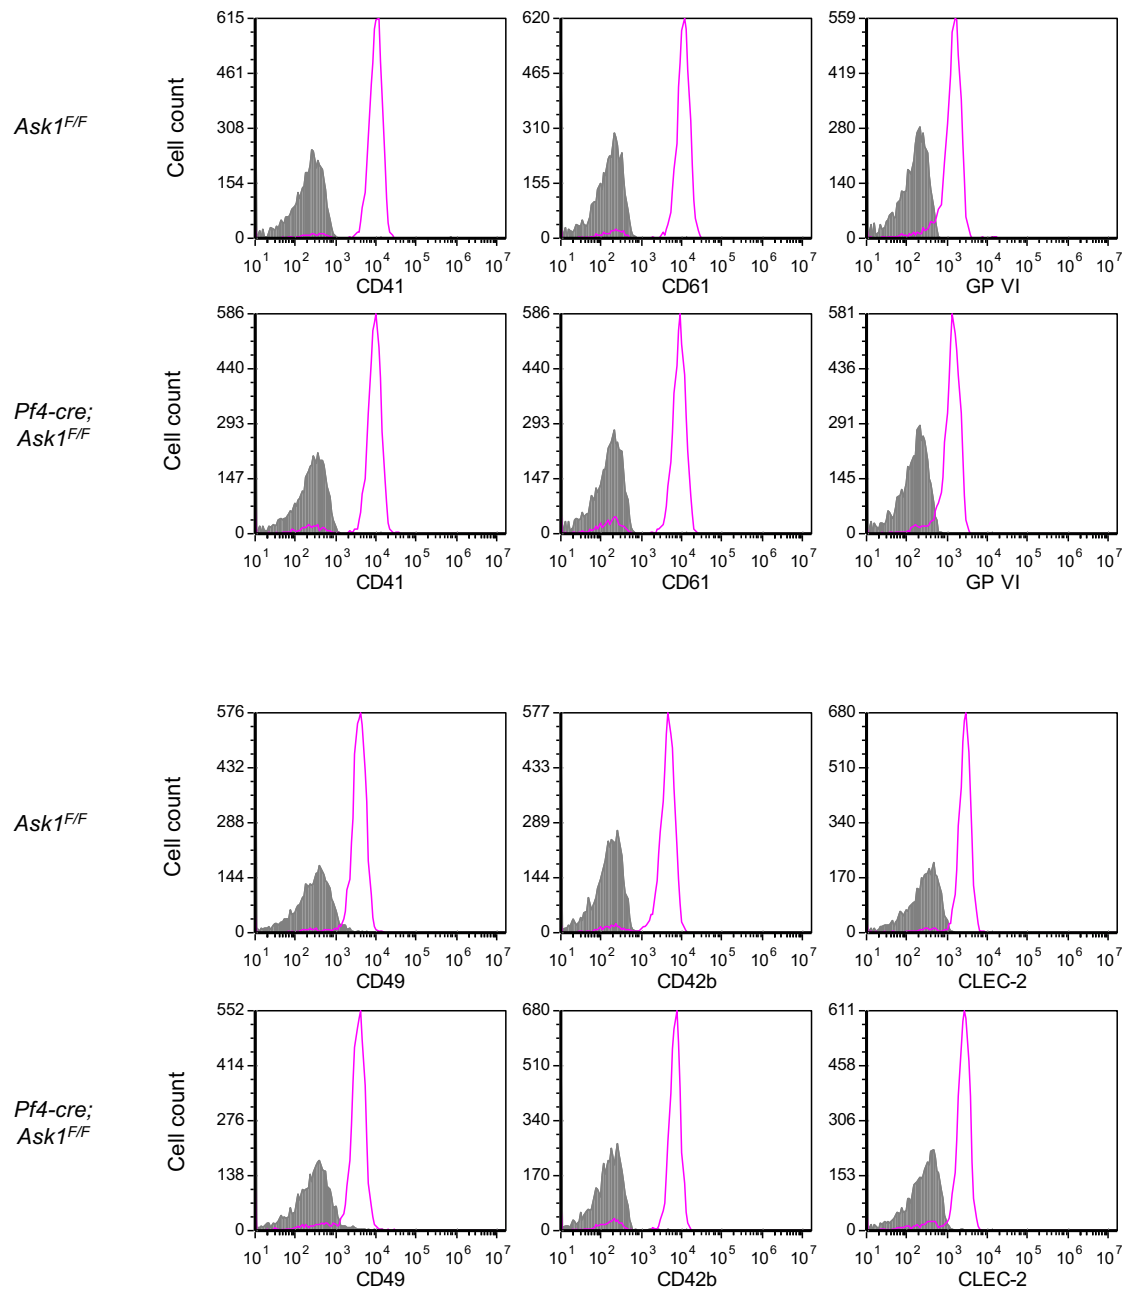

**Supplementary Figure 3** Surface expression of platelet receptors on platelets from

*Ask1<sup>F/F</sup>* and *Pf4-cre; Ask1<sup>F/F</sup>* mice. The surface expression of platelet receptors was

determined by flow cytometry (n = 3). The isotype controls are noted in gray.

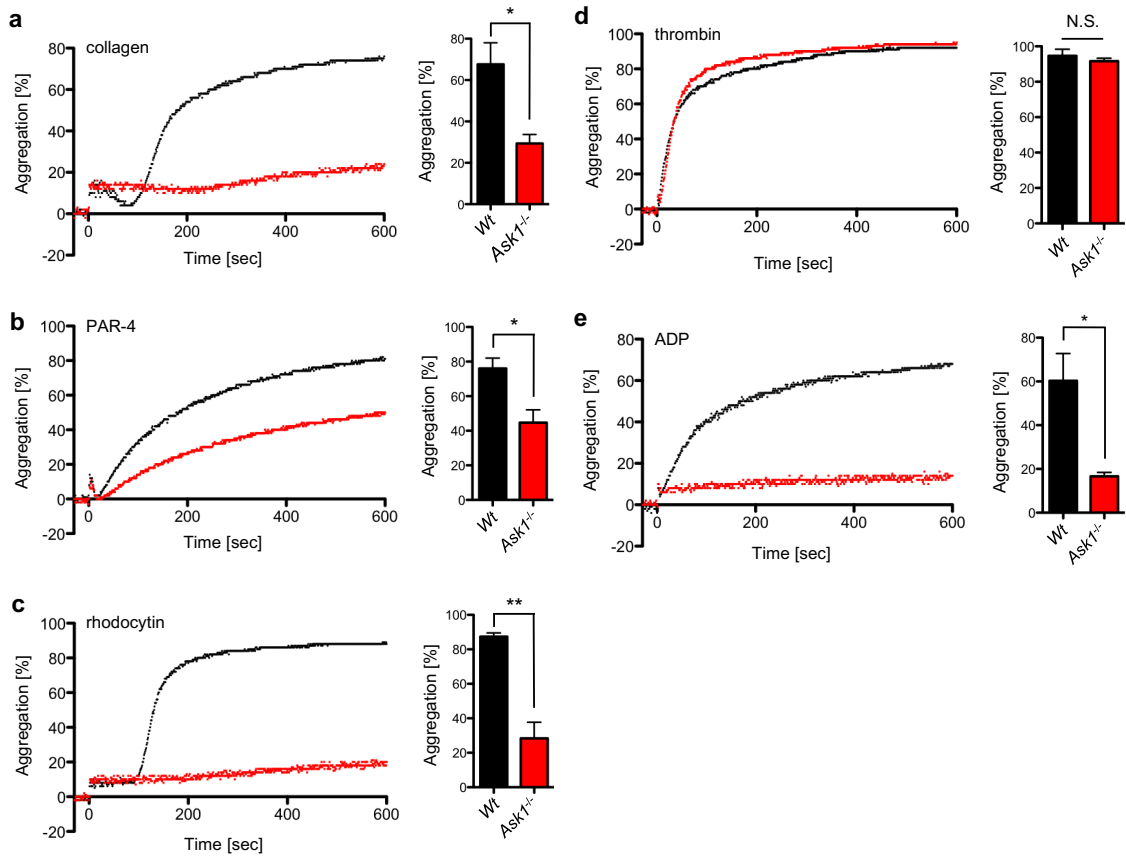

**Supplementary Figure 4** *Ask1*<sup>-/-</sup> mice shows defects in ADP-dependent platelet aggregation. **(a-e)** Platelet aggregation of *Wt* and *Ask1*<sup>-/-</sup> mice induced by 1  $\mu$ g/ml collagen **(a)**, 50  $\mu$ M PAR-4 **(b)**, 1 nM rhodocytin **(c)**, 0.025 U/ml thrombin **(d)** and 10  $\mu$ M ADP **(e)**. Representative traces (left) and the maximal aggregation percentage within 10 minutes of measurement (right) are presented. The data are expressed as the mean  $\pm$  s.e.m. (n = 3 each). \*\*p < 0.01; \*p < 0.05; N.S., non-significant. Unpaired Student's *t*-tests **(a-e)**.

| Analyzed parameters [unit]      | <i>Wt</i>       | <i>Ask1<sup>-/-</sup></i> | <i>Ask1<sup>F/F</sup></i> | <i>Pf4-cre; Ask1<sup>F/F</sup></i> |
|---------------------------------|-----------------|---------------------------|---------------------------|------------------------------------|
| Leukocyte [ $10^3$ / $\mu$ l]   | 1.19 $\pm$ 0.31 | 1.36 $\pm$ 0.13           | 1.48 $\pm$ 0.04           | 1.41 $\pm$ 0.36                    |
| Erythrocyte [ $10^4$ / $\mu$ l] | 1.07 $\pm$ 0.05 | 1.00 $\pm$ 0.03           | 1.04 $\pm$ 0.04           | 0.98 $\pm$ 0.02                    |
| Hemoglobin [g/dl]               | 1.50 $\pm$ 0.12 | 1.40 $\pm$ 0.06           | 1.53 $\pm$ 0.03           | 1.43 $\pm$ 0.03                    |
| Hematocrit [%]                  | 5.00 $\pm$ 0.26 | 4.73 $\pm$ 0.15           | 4.90 $\pm$ 0.21           | 4.70 $\pm$ 0.12                    |
| Platelet [ $10^3$ / $\mu$ l]    | 92.3 $\pm$ 4.37 | 89.7 $\pm$ 4.48           | 109.7 $\pm$ 8.65          | 105.0 $\pm$ 6.51                   |
| MCV [fl]                        | 46.5 $\pm$ 0.44 | 47.3 $\pm$ 0.22           | 47.2 $\pm$ 0.37           | 47.8 $\pm$ 0.35                    |
| MCH [pg]                        | 14.0 $\pm$ 0.50 | 14.0 $\pm$ 0.24           | 14.8 $\pm$ 0.23           | 14.6 $\pm$ 0.24                    |
| MCHC [g/dl]                     | 29.9 $\pm$ 0.82 | 29.6 $\pm$ 0.34           | 31.4 $\pm$ 0.69           | 30.5 $\pm$ 0.38                    |

### Supplementary Table 1

Hematological parameters. Data are mean  $\pm$  s.e.m. (n = 3).
